# Supplementary material for: La Chanson de Roland y algunos problemas históricos
Source: Royal Society of Chemistry journal article supplement (doi:10.1039/c3cc44386h), 1985-01-01
Supplement: c3cc44386h.pdf [file c3cc44386h.pdf]

## Supporting Information

### Isolation of C<sub>102</sub> fractions

The fullerene soot was synthesized by a Krätschmer-Huffman DC-arc discharging method with undoped graphite rod under the condition of 400 mbar He. The as-produced soot was Soxhlet-extracted by CS<sub>2</sub> for 24 h. The fullerene mixture was subjected to HPLC separation in toluene using a preparative 5PYE column (20 × 250 mm, Nacalai Tesque, Japan; flow rate 15.0 ml/min; injection volume 15 ml; toluene as eluent). The fraction eluted between 44 and 47 min (**fraction A**) was further separated with a semi-preparative Buckyprep column (10 × 250 mm, Nacalai Tesque, Japan; flow rate 5.0 ml/min; injection volume 5 ml; toluene as eluent) and the main fraction (**A-3**) was subjected to recycling HPLC separation with a semi-preparative Buckyprep-M column (10 × 250 mm, Nacalai Tesque, Japan; flow rate 5.0 ml/min; injection volume 5 ml; toluene as eluent) (see Fig. S1). Each of four fractions collected after eight separation cycles contains C<sub>102</sub> as the main component according to MALDI-TOF mass spectrometry. The first of four C<sub>102</sub> fractions (**A-3-1**), which did not show any noticeable contamination with other fullerenes (see Fig. S2), was used as the starting material for chlorination.

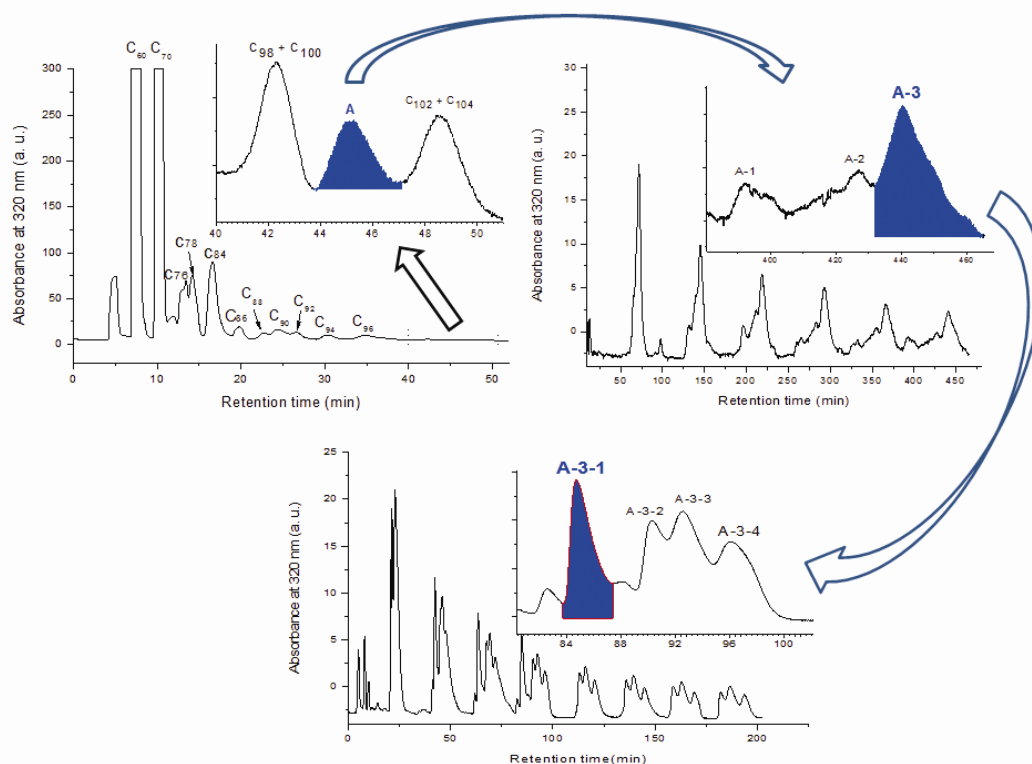

Fig. S1. Three-step HPLC isolation of a compositionally pure C<sub>102</sub> fraction (fraction **A-3-1**) used for chlorination (see text).

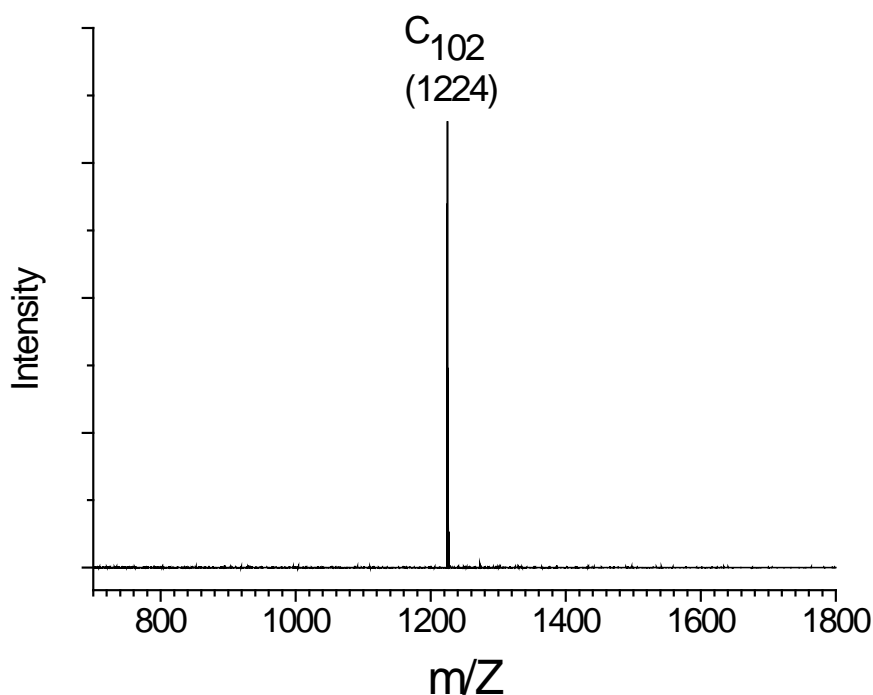

Fig. S2. MALDI TOF mass spectrum of subfraction **A-3-1**.

The estimation of the extremely low amount  $C_{102}$  used in our chlorination experiments could not be done by direct sample weighing. Instead, we estimated the  $C_{102}$  content by the following rough procedure. First, HPLC trace of the mixture solution of the known amount of the fullerene soot extract was analyzed by integrating all chromatographic peaks, providing information about the relative content of fraction **A** (see Fig. S1). Then, it was recalculated to the absolute amount with the assumption that the extinction coefficients of fullerenes at the wavelength of 320 nm (the wavelength used in HPLC detection) are approximately the same. This assumption was supported at least for the case of  $C_{60}$  and  $C_{70}$  fullerenes, which possess very close extinction coefficients determined at the same conditions in the separate quantitative experiments. The amount of the subfraction A-3-1 was calculated by integrating the corresponding HPLC subfractions and multiplying by the number of runs.

#### **Numbering of $C_{102}$ isomers**

Theoretical calculations of relative stability of IPR  $C_{102}$  isomers were reported in the literature using two different numbering systems.<sup>S1-S3</sup> The numbering in ref. S1 and S2 is based on the sequence in the output of the generation program in ref. S4 (PentHex Puzzles). A more usual way of fullerene numbering uses the spiral algorithm of ref. S5. The correspondence of isomer numbers for fifteen IPR  $C_{102}$  isomers, which were considered in refs. S1 and S2, according to the numbering systems in refs. S4 and S5 is given below.



|     |                                                           |             |       |
|-----|-----------------------------------------------------------|-------------|-------|
| 602 | 56666656656656666666666666666656656656656656666566566566  | -3883.65439 | 39.1  |
| 374 | 5666665656656666666666665666566565656665666666566566      | -3883.65432 | 39.3  |
| 326 | 5666665656656666666666665656656566566666666656656566      | -3883.65398 | 40.2  |
| 601 | 566666566566566666666666566656656656665666566566566       | -3883.65350 | 41.5  |
| 582 | 56666656656656666666666656566565666566666665666656656     | -3883.65328 | 42.0  |
| 612 | 5666665665666666665666566565666666666656656566566665      | -3883.65314 | 42.4  |
| 525 | 5666665665656666666666665656665666566656665666566665665   | -3883.65275 | 43.4  |
| 405 | 566666565666566666666656666666565665665656666665665666    | -3883.65271 | 43.5  |
| 19  | 56666656565656666666666666666666665656656565666656656     | -3883.65258 | 43.9  |
| 328 | 56666656566566666666666656566565666566666665666656656     | -3883.65257 | 43.9  |
| 592 | 5666665665665666666666665665665665666666566566565666      | -3883.65250 | 44.1  |
| 523 | 56666656656566666666666656566656656666656566665666656     | -3883.65233 | 44.5  |
| 435 | 566666566565656666666666666666566656665656656665665666    | -3883.65217 | 44.95 |
| 610 | 56666656656665666666666656666566565666665666666566565     | -3883.65216 | 45.0  |
| 360 | 56666656566566666666666656666566565666565665666566666     | -3883.65206 | 45.2  |
| 096 | 566666565656666666666666566566666666666656656565665656    | -3883.65203 | 45.3  |
| 34  | 5666665656566566666666666666665666656665666566656656566   | -3883.65200 | 45.4  |
| 550 | 5666665665656666666666665665656666565666665656665666      | -3883.65199 | 45.4  |
| 605 | 56666656656665666566656665666666665666656656666566566566  | -3883.65157 | 46.5  |
| 35  | 5666665656566566666666666666665666656665666566656665665   | -3883.65147 | 46.8  |
| 331 | 566666565665666666666666565665665665666665666665666656656 | -3883.65146 | 46.8  |
| 488 | 566666566565666666566666665666666656666666566656566566566 | -3883.65133 | 47.2  |
| 17  | 56666656565656666666666666666666665656566565666665656     | -3883.65110 | 47.8  |
| 332 | 5666665656656666666666665656656656666666656565656666      | -3883.65101 | 48.0  |
| 165 | 5666665656656666666656666666566666665666565665665666566   | -3883.65074 | 48.7  |
| 245 | 5666665656656666666666665665665656666666665656565666      | -3883.64973 | 51.4  |
| 316 | 566666565665666666666666566666566566656565666656666566    | -3883.64879 | 53.8  |
| 43  | 56666656565665666666666666666656566565656666666565        | -3883.64876 | 53.9  |

Isomer 552 (616 according to the numbering system in ref. S4) has a relative formation energy of 55.7 kJ mol<sup>-1</sup>.

## References

- S1 J. Cioslowski, N. Rao and D. Moncrieff, *J. Am. Chem. Soc.*, 2000, **122**, 8265.  
S2 Z. Chen and W. Thiel, *Chem. Phys. Lett.*, 2003, **367**, 15.  
S3 N. Shao, Y. Gao, S. Yoo, W. An and X.-C. Zeng, *J. Phys. Chem., A* **2006**, *110*, 7672.  
S4 A. W. M. Dress and G. Brinkmann, *Adv. Appl. Math.*, 1998, **21**, 473.  
S5 P. W. Fowler and D. E. Manolopoulos, *An Atlas of Fullerenes*, Clarendon, Oxford, 1995  
S6 D. N. Laikov, *Chem. Phys. Lett.*, 1997, **281**, 151.  
S7 J. P. Perdew, K. Burke and M. Ernzerhof, *Phys. Rev. Lett.*, 1996, **77**, 3865.
